# Supplementary material for: Ultraviolet absorption cross sections of carbonyl sulfide isotopologues OC 32 S, OC 33 S, OC 34 S and O 13 CS: isotopic fractionation in photolysis and atmospheric implications
Source: Copernicus journal article supplement (doi:10.5194/acp-11-10293-2011), 2011-10-14
Supplement: Supplementary file 1 [file acp-11-10293-2011-supplement.zip]

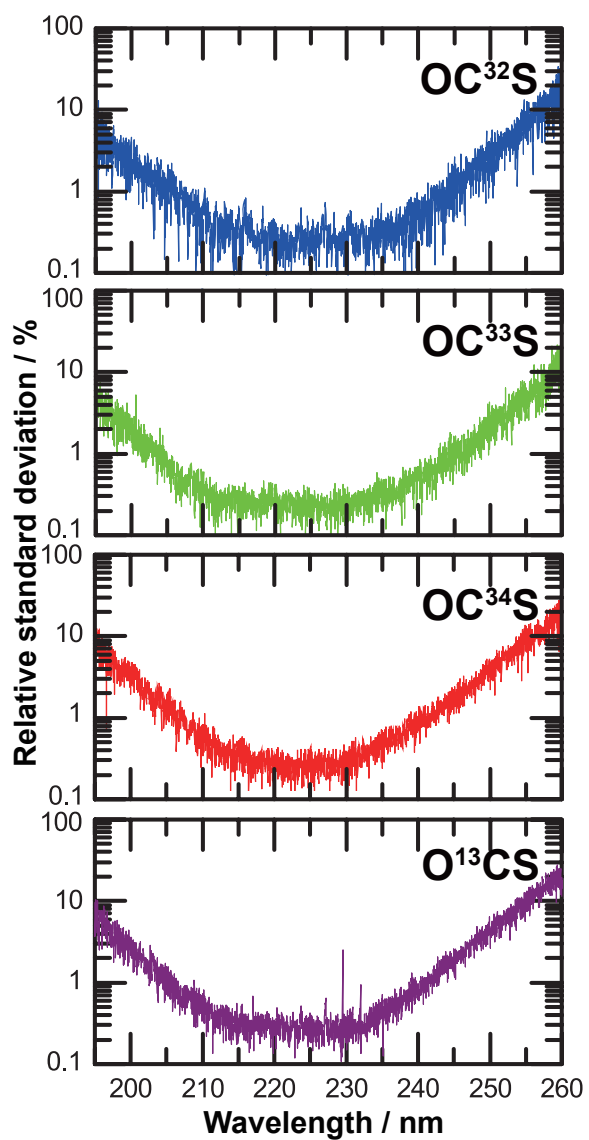

**Fig. A1.** Relative standard deviation (%) of measured absorption cross sections for  $\text{OC}^{32}\text{S}$ ,  $\text{OC}^{33}\text{S}$ ,  $\text{OC}^{34}\text{S}$ , and  $\text{O}^{13}\text{CS}$ .
